# Supplementary material for: Inflammatory monocytes promote progression of Duchenne muscular dystrophy and can be therapeutically targeted via CCR2
Source: PubMed Central journal article supplement (PMC4237472; doi:10.15252/emmm.201403967), 2014-10-13

Figure S4

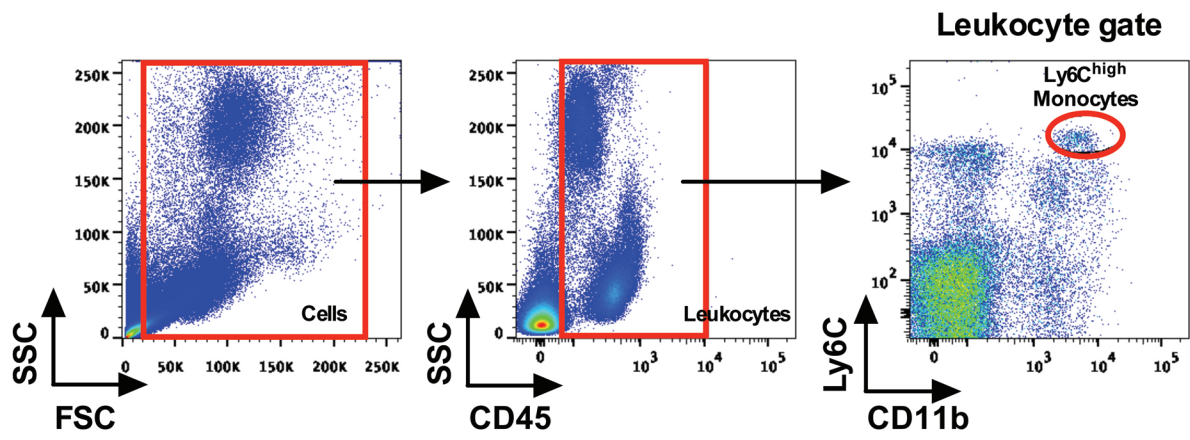

Supplement: emmm0006-1476-sd5.pdf [file emmm0006-1476-sd5.pdf]
